# Supplementary material for: Answer ALS, a large-scale resource for sporadic and familial ALS combining clinical and multi-omics data from induced pluripotent cell lines
Source: Springer Nature journal article supplement (doi:10.1038/s41593-021-01006-0), 2022-02-01
Supplement: 41593_2021_1006_MOESM2_ESM.pdf [file 41593_2021_1006_MOESM2_ESM.pdf]

**Supplementary Tables 1-6, 19-26**

**Supplementary Table 1. Clinic Locations for Answer ALS**

| <b>Clinic</b>                  | <b>Location</b> | <b>Local PI</b>       |
|--------------------------------|-----------------|-----------------------|
| Johns Hopkins University       | Baltimore, MD   | Nick Maragakis MD     |
| Massachusetts General Hospital | Boston, MA      | James Berry MD        |
| Emory University               | Atlanta, GA     | Jon Glass MD          |
| Washington University          | St. Louis, MO   | Tim Miller MD, PhD    |
| Northwestern University        | Chicago, IL     | Senda Ajroud-Driss MD |
| Texas Neurology                | Dallas, TX      | Daragh Heitzman MD    |
| Cedars Sinai Medical Center    | Los Angeles, CA | Robert Baloh MD, PhD  |

**Supplementary Table 2. Answer ALS Clinical Events**

| Week                                                | Enrollment        | Follow-up Period  |             |             |             | Post Participation Followup Period <sup>1</sup> |
|-----------------------------------------------------|-------------------|-------------------|-------------|-------------|-------------|-------------------------------------------------|
|                                                     | 0                 | 12                | 24          | 36          | 48          | Every 3 months                                  |
| Window                                              |                   | 84±42 days        | 168±42 days | 252±42 days | 336±42 days | (±42 days)                                      |
| Visit Number                                        | Screening/Visit 1 | Visit 2           | Visit 3     | Visit 4     | Visit 5     | Follow-up                                       |
| <b>Eligibility/Consenting</b>                       |                   |                   |             |             |             |                                                 |
| Written informed consent                            | X <sup>HC</sup>   |                   |             |             |             |                                                 |
| Inclusion/Exclusion review                          | X <sup>HC</sup>   |                   |             |             |             |                                                 |
| <b>Clinical Information Collection</b>              |                   |                   |             |             |             |                                                 |
| Medical History/Demographics*                       | X <sup>HC</sup>   |                   |             |             |             |                                                 |
| Create GUID*                                        | X <sup>HC</sup>   |                   |             |             |             |                                                 |
| ALS History/Genetics*                               | X                 |                   |             |             |             |                                                 |
| Environmental Questionnaire*                        | X <sup>HC</sup>   |                   |             |             |             |                                                 |
| Concomitant Medication review*                      | X <sup>HC</sup>   | X <sup>HC</sup>   | X           | =           | X           |                                                 |
| Adverse Event Review*                               | X <sup>HC</sup>   | X <sup>HC</sup>   | X           | X           | X           |                                                 |
| Key Study Event Review                              | X                 | X                 | X           | X           | X           | X                                               |
| Vitals Signs/Height&Weight <sup>2</sup>             | X <sup>HC</sup>   | X <sup>HC</sup>   | X           | X           | X           |                                                 |
| Confirmation of Diagnosis*                          | X <sup>HC</sup>   | X <sup>HC</sup>   | X           | X           | X           | X                                               |
| <b>Outcome Measure Collection</b>                   |                   |                   |             |             |             |                                                 |
| Slow vital capacity                                 | X                 | X                 | X           | X           | X           | X                                               |
| Hand Held Dynamometry                               | X <sup>HC**</sup> | X <sup>HC**</sup> | X           | X           | X           |                                                 |
| Penn Upper Motor Neuron Burden (UMN-B) <sup>3</sup> | X <sup>HC</sup>   | X                 | X           | X           | X           |                                                 |
| ALSFRS-R*                                           | X                 | X                 | X           | X           | X           | X                                               |
| ALS Cognitive Behavioral Scale (ALSCBS)             | X                 | X                 | X           | X           | X           |                                                 |
| <b>SAMPLE COLLECTION</b>                            |                   |                   |             |             |             |                                                 |
| Lumbar Puncture (CSF collection) OPTIONAL           | X <sup>HC</sup>   | X <sup>HC</sup>   | X           | X           | X           |                                                 |
| Additional Blood Samples OPTIONAL                   | X <sup>HC</sup>   | X <sup>HC</sup>   | X           | X           | X           |                                                 |
| Biomarker Studies                                   | X <sup>HC</sup>   | X <sup>HC</sup>   | X           | X           | X           |                                                 |

<sup>1</sup> Follow-up continued every 3 months to collect data on survival status/Key Study Events. This information was obtained via chart review and/or participant contact.

<sup>2</sup> Vital signs include systolic and diastolic pressure in mmHg, respiratory rate/minute, heart rate/minute, temperature and weight. Height measured at Screening Visit only.

<sup>3</sup> The Penn Upper Motor Neuron-Burden (UMN-B) includes testing of reflexes, the CNS Lability Scale (CNS-LS) and the Ashworth Spasticity Scale

<sup>4</sup> The participant may choose to have CSF collected at any visit (if only collected once), all visits, or no visits.

<sup>5</sup> Additional blood samples include Uric Acid, Creatinine, Phosphorus, and Creatine Kinase (CK).

<sup>6</sup> Biomarker Studies included blood samples for plasma, serum, whole blood for DNA and aliquots, and PBMC collection. PBMC was collected at Visit 1. Whole blood for DNA sequencing was drawn once at any visit, preferably Visit 1. Whole blood can be drawn at any visit for aliquot. Plasma and serum were collected at each visit. Plasma and serum were stored in the NEALS Biorepository for future analysis. Please refer to the Site Manual of Procedures (MOP) for collection, storage, and shipping information.

<sup>HC</sup>Procedures to be completed also by healthy control volunteers,

<sup>HC\*\*</sup> HHD is optional for healthy control (!-IC) volunteers only

\* Procedures with an asterisk(\*) were completed via the telephone if these measures were not collected at the scheduled visits.

**Supplementary Table 3. Data and Biospecimen Sources.** The authors declare that all data supporting the findings of this study are available within the paper and its supplementary information files and web portals listed in this table.

| <b>Reagent</b>                                                                                  | <b>Location</b>  | <b>Web Address</b>                                                                                                                                                                                                                              |
|-------------------------------------------------------------------------------------------------|------------------|-------------------------------------------------------------------------------------------------------------------------------------------------------------------------------------------------------------------------------------------------|
| Clinical Data sets                                                                              | Neurobank        | <a href="http://www.neurobank.org">http://www.neurobank.org</a>                                                                                                                                                                                 |
| Whole Genome                                                                                    | NY Genome Center | <a href="https://www.nygenome.org/als-consortium/">https://www.nygenome.org/als-consortium/</a>                                                                                                                                                 |
| Induced Pluripotent cell lines                                                                  | Cedars Sinai     | <a href="https://www.cedars-sinai.edu/Research/Research-Cores/Induced-Pluripotent-Stem-Cell-Core-/Answer-ALS-Project.aspx">https://www.cedars-sinai.edu/Research/Research-Cores/Induced-Pluripotent-Stem-Cell-Core-/Answer-ALS-Project.aspx</a> |
| Biofluids (serum, CSF)                                                                          | Neurobank        | <a href="https://www.neals.org/for-als-researchers/neals-sample-repository/">https://www.neals.org/for-als-researchers/neals-sample-repository/</a>                                                                                             |
| ALL Clinical and Omics data (transcriptome, proteome, epigenome); selecting/ordering cell lines | Answer ALS       | <a href="https://data.answerals.org/home">https://data.answerals.org/home</a>                                                                                                                                                                   |

**Supplementary Table 4. Overall Clinical Demographics**

| Variable                                        | Level                  | Overall               | Subjects              |                       |                       |                       |
|-------------------------------------------------|------------------------|-----------------------|-----------------------|-----------------------|-----------------------|-----------------------|
|                                                 |                        |                       | ALS                   | Asymptomatic ALS      | Healthy Control       | Non-ALS-MND           |
| Participants                                    | N                      | 100.0% (1047)         | 82.2% (861)           | 1.1% (12)             | 10.3% (108)           | 6.3% (66)             |
| Sex                                             | Female                 | 40.6% (423)           | 37.4% (320)           | 58.3% (7)             | 66.4% (71)            | 37.9% (25)            |
|                                                 | Male                   | 59.4% (618)           | 62.6% (536)           | 41.7% (5)             | 33.6% (36)            | 62.1% (41)            |
|                                                 | [missing]              | %. (6)                | %. (5)                | %. (0)                | %. (1)                | %. (0)                |
| Race                                            | American Indian        | 0.2% (2)              | 0.1% (1)              | 0.0% (0)              | 1.0% (1)              | 0.0% (0)              |
|                                                 | Asian                  | 2.0% (21)             | 1.5% (13)             | 0.0% (0)              | 5.7% (6)              | 3.0% (2)              |
|                                                 | Black                  | 4.8% (49)             | 5.0% (42)             | 0.0% (0)              | 4.8% (5)              | 3.0% (2)              |
|                                                 | Pacific Islander       | 0.1% (1)              | 0.1% (1)              | 0.0% (0)              | 0.0% (0)              | 0.0% (0)              |
|                                                 | White                  | 92.9% (956)           | 93.3% (789)           | 100.0% (12)           | 88.6% (93)            | 93.9% (62)            |
|                                                 | [missing]              | %. (18)               | %. (15)               | %. (0)                | %. (3)                | %. (0)                |
| Ethnicity                                       | Hispanic or Latino     | 4.8% (50)             | 5.3% (45)             | 0.0% (0)              | 2.8% (3)              | 3.1% (2)              |
|                                                 | Not Hispanic or Latino | 95.2% (989)           | 94.7% (810)           | 100.0% (12)           | 97.2% (104)           | 96.9% (63)            |
|                                                 | [missing]              | %. (8)                | %. (6)                | %. (0)                | %. (1)                | %. (1)                |
| Age at baseline (yrs)                           | Years (mean(SD))       | 58.9±11.6 (20.0,91.0) | 59.3±11.1 (24.0,91.0) | 48.3±10.3 (33.0,62.0) | 55.0±14.1 (20.0,82.0) | 61.9±12.0 (26.0,85.0) |
| Time between symptom onset and diagnosis        | Months (mean(SD))      | 15.9±20.4 (-5.7,286)  | 14.8±16.8 (-5.7,185)  | N/A                   | N/A                   | 40.8±52.6 (0.1,286)   |
| Time between symptom onset and study enrollment | Months (mean(SD))      | 32.0±39.4 (0.6,458)   | 29.8±35.6 (0.6,458)   | N/A                   | N/A                   | 78.4±75.3 (11.1,353)  |
| BMI at screening visit                          | mean(SD)               | 26.8±6.39 (10.1,150)  | 26.5±4.83 (10.1,44.4) | 29.2±3.38 (23.6,34.2) | 29.2±14.9 (17.0,150)  | 27.3±5.61 (16.6,47.3) |
| ALSFRS-R at first ALSFRS-R visit                | mean(SD)               | 33.8±8.65 (0.0,47.0)  | 33.8±8.67 (0.0,47.0)  | N/A                   | N/A                   | 33.5±8.44 (7.0,46.0)  |
| ALSFRS-R slope                                  |                        | -.73±0.87 (-5.1,1.4)  | -.77±0.88 (-5.1,1.4)  | N/A                   | N/A                   | -.11±0.40 (-1.6,1.0)  |
| FVC (%-pred) at first ALSFRS-R visit            | mean(SD)               | 69.9±24.0 (4.0,126)   | 69.6±23.9 (4.0,125)   | N/A                   | N/A                   | 73.7±25.3 (17.0,126)  |
| FVC slope                                       |                        | -1.5±2.53 (-16,14.1)  | -1.6±2.59 (-16,14.1)  | N/A                   | N/A                   | -.12±0.86 (-1.9,2.1)  |
| Edaravone                                       | No                     | 90.0% (942)           | 87.9% (757)           | 100.0% (12)           | 100.0% (108)          | 98.5% (65)            |
|                                                 | Yes                    | 10.0% (105)           | 12.1% (104)           | 0.0% (0)              | 0.0% (0)              | 1.5% (1)              |
| Riluzole                                        | No                     | 46.3% (485)           | 36.4% (313)           | 91.7% (11)            | 100.0% (108)          | 80.3% (53)            |
|                                                 | Yes                    | 53.7% (562)           | 63.6% (548)           | 8.3% (1)              | 0.0% (0)              | 19.7% (13)            |
| Follow-Up Duration                              | Months (mean(SD))      | 13.3±17.3 (0.0,340)   | 12.5±12.6 (0.0,94.1)  | N/A                   | N/A                   | 24.0±47.2 (0.0,340)   |

**Supplementary Table 5. Fast vs Slow Progression Demographics**

| Fast vs. Slow Progressors                       |                        | Cohort                |                       |                       | Level |
|-------------------------------------------------|------------------------|-----------------------|-----------------------|-----------------------|-------|
| Variable                                        | Level                  | Overall               | Fast                  | Slow                  | P-val |
| Participants                                    | N                      | 100.0% (200)          | 50.0% (100)           | 50.0% (100)           | .     |
| Sex                                             | Female                 | 38.0% (76)            | 42.0% (42)            | 34.0% (34)            | 0.244 |
|                                                 | Male                   | 62.0% (124)           | 58.0% (58)            | 66.0% (66)            | 0.244 |
|                                                 | [missing]              | N/A                   | N/A                   | N/A                   | N/A   |
| Race                                            | American Indian        | N/A                   | N/A                   | N/A                   | .     |
|                                                 | Asian                  | 0.5% (1)              | 0.0% (0)              | 1.0% (1)              | 0.321 |
|                                                 | Black                  | 4.5% (9)              | 2.0% (2)              | 7.0% (7)              | 0.094 |
|                                                 | Pacific Islander       | 0.5% (1)              | 0.0% (0)              | 1.0% (1)              | 0.321 |
|                                                 | White                  | 94.4% (187)           | 98.0% (96)            | 91.0% (91)            | 0.033 |
|                                                 | [missing]              | .% (2)                | .% (2)                | .% (0)                | N/A   |
| Ethnicity                                       | Hispanic or Latino     | 4.0% (8)              | 5.1% (5)              | 3.0% (3)              | 0.462 |
|                                                 | Not Hispanic or Latino | 96.0% (191)           | 94.9% (94)            | 97.0% (97)            | 0.462 |
|                                                 | [missing]              | .% (1)                | .% (1)                | .% (0)                | N/A   |
| Age at baseline (yrs)                           | Years (mean(SD))       | 60.5±10.4 (29.0,85.0) | 60.5±10.2 (29.0,84.0) | 60.8±10.8 (34.0,85.0) | 0.855 |
| Time between symptom onset and diagnosis        | Months (mean(SD))      | 16.5±21.0 (-5.7,157)  | 10.3±11.0 (-5.7,90.3) | 23.1±26.6 (1.1,157)   | <.001 |
| Time between symptom onset and study enrollment | Months (mean(SD))      | 33.9±48.9 (0.6,458)   | 16.9±15.7 (0.6,104)   | 52.0±63.7 (2.9,458)   | <.001 |
| BMI at screening visit                          | mean(SD)               | 26.0±4.90 (13.7,42.0) | 25.6±4.83 (13.7,38.1) | 26.5±4.97 (16.0,42.0) | 0.218 |
| ALSFRS-R at first ALSFRS-R visit                | mean(SD)               | 32.9±8.20 (10.0,47.0) | 33.8±6.93 (14.0,46.0) | 32.0±9.24 (10.0,47.0) | 0.111 |
| ALSFRS-R slope                                  |                        | -1.1±1.44 (-5.1,1.4)  | -2.3±0.78 (-5.1,-1.6) | 0.25±0.35 (-0.0,1.4)  | <.001 |
| FVC (%-pred) at first ALSFRS-R visit            | mean(SD)               | 66.8±21.8 (12.0,100)  | 65.4±21.1 (16.0,94.0) | 68.4±22.7 (12.0,100)  | 0.528 |
| FVC slope                                       |                        | -1.9±2.66 (-16,3.0)   | -3.3±2.98 (-16,3.0)   | -.76±1.68 (-6.5,1.7)  | <.001 |
| Edaravone                                       | No                     | 87.5% (175)           | 85.0% (85)            | 90.0% (90)            | 0.285 |
|                                                 | Yes                    | 12.5% (25)            | 15.0% (15)            | 10.0% (10)            |       |
| Riluzole                                        | No                     | 36.5% (73)            | 32.0% (32)            | 41.0% (41)            | 0.186 |
|                                                 | Yes                    | 63.5% (127)           | 68.0% (68)            | 59.0% (59)            |       |
| Follow-Up Duration                              | Months (mean(SD))      | 11.3±11.8 (1.3,94.1)  | 7.86±4.36 (1.3,18.6)  | 14.7±15.4 (1.9,94.1)  | <.001 |
| Subject Death                                   | No                     | 52.0% (104)           | 28.0% (28)            | 76.0% (76)            | <.001 |
|                                                 | Yes                    | 48.0% (96)            | 72.0% (72)            | 24.0% (24)            |       |
| Time Onset to Death (months)                    | Months (mean(SD))      | 34.7±27.6 (8.3,187)   | 29.5±15.7 (8.3,105)   | 50.3±45.3 (9.7,187)   | 0.001 |

## Supplementary Table 6. Characterization and Validation of IPS cell lines

The following testing specifications have been met for the specified cell line:

| Test Description                                                                                    | Test Specification                                                                                            | Result    |
|-----------------------------------------------------------------------------------------------------|---------------------------------------------------------------------------------------------------------------|-----------|
| <b>Mycoplasma</b>                                                                                   | No contamination detected                                                                                     | Pass      |
| <b>Alkaline Phosphatase Staining</b>                                                                | Positive AP staining                                                                                          | Pass      |
| <b>Karyotype by G-Banding</b>                                                                       | Normal Karyotype                                                                                              | Pass      |
| <b>Pluripotency</b>                                                                                 |                                                                                                               |           |
| <i>PrimeView Global Gene Expression Profile Assay (PluriTest)</i>                                   | Pluripotency score $\geq 20$ and novelty score $\leq 1.6$                                                     | N/A       |
| <i>Immunocytochemistry (IF-IC)</i>                                                                  | OCT3/4, NANOG, SOX2, TRA-1-60, TRA-1-81, SSEA4                                                                | Pass      |
| <a href="#"><i>TaqMan® hPSC Scorecard™ Assay</i></a>                                                | Confirm appropriate expression of self-renewal factors                                                        | Pass      |
| <b>Differentiation</b>                                                                              |                                                                                                               |           |
| <i>EB Formation</i>                                                                                 | Successful Embryoid Body (EB) formation after 14 days                                                         | Pass      |
| <a href="#"><i>TaqMan® hPSC Scorecard™ Assay</i></a>                                                | Tri-lineage differentiation potential<br><i>Endoderm, Ectoderm and Mesoderm</i>                               | Pass      |
| <b>Reprogramming Plasmid Integration</b>                                                            |                                                                                                               |           |
| <i>Genomic DNA PCR</i>                                                                              | Confirm the presence or absence of exogenous reprogramming plasmids                                           | Absent    |
| <b>Parent Cell Line Lineage Determination</b>                                                       |                                                                                                               |           |
| <a href="#"><i>TCRB + TCRG T-Cell Clonality Assay</i></a><br><i>(Blood derived cell lines only)</i> | Confirm presence or absence of clonal T-cell receptor beta chain and gamma chain gene rearrangements in iPSCs | Confirmed |
| <b>Cell Line Authentication</b>                                                                     |                                                                                                               |           |
| <a href="#"><i>STR Analysis</i></a>                                                                 | Confirm identity matching score is above 80%                                                                  | Confirmed |

### Supplemental Table 19. Cell Line Authentication

A typical example of an iPSC line STR matching report

CELL LINE AUTHENTICATION:

Parent Cell Line: NEUFV237VCZ

|      |        |         |         |        |        |      |       |     |
|------|--------|---------|---------|--------|--------|------|-------|-----|
| AMEL | CSF1PO | D13S317 | D16S539 | D5S818 | D7S820 | TH01 | TPOX  | vWA |
| X, Y | 10     | 11, 12  | 11      | 11     | 9, 10  | 9.3  | 8, 11 | 19  |

iPSC Line: CS7VCZiALS-n3

|      |        |         |         |        |        |      |       |     |
|------|--------|---------|---------|--------|--------|------|-------|-----|
| AMEL | CSF1PO | D13S317 | D16S539 | D5S818 | D7S820 | TH01 | TPOX  | vWA |
| X, Y | 10     | 11, 12  | 11      | 11     | 9, 10  | 9.3  | 8, 11 | 19  |

% Identity Match: 100%

IDEXX IBR #(s): 22009-2017 #19

### Supplemental Table 20. Data Level Definitions

| Data Levels | Description                                           |
|-------------|-------------------------------------------------------|
| Level 1     | Immutable raw data                                    |
| Level 2     | Raw data mapped to reference                          |
| Level 3     | Most-processed sample-specific data                   |
| Level 4     | Analysis from joining Level 3 data for specific assay |

### Supplementary Table 21. Examples of Data Levels for each assay

| Assay           | Level 1 | Level 2 | Level 3     | Level 4                  |
|-----------------|---------|---------|-------------|--------------------------|
| Genomics        | FASTQ   | BAM     | VCF         | Joint VCF                |
| Epigenomics     | FASTQ   | BAM     | Peaks       | Differential Peaks       |
| Transcriptomics | FASTQ   | BAM     | Counts      | Differential Counts      |
| Proteomics      | WIFF    | MZML    | Intensities | Differential Intensities |

**Supplementary Table 22. Stage 1 Cell Culture Media**

| Stage 1<br>(Day 0-Day 6) | Manufacturer      | Catalog # | 1X Concentration |
|--------------------------|-------------------|-----------|------------------|
| IMDM                     | Life Technologies | 12440061  | 47.5%            |
| F12                      | Life Technologies | 11765062  | 47.5%            |
| NEAA                     | Life Technologies | 11140-50  | 1%               |
| B27                      | Life Technologies | 17504044  | 2%               |
| N2                       | Life Technologies | 17502048  | 1%               |
| Anti/Anti                | Life Technologies | 15240062  | 1%               |
| LDN193189                | Cayman Chemical   | 19396     | 0.2 $\mu$ M      |
| CHIR99021                | Xcess bioscience  | M60002    | 3 $\mu$ M        |
| SB431542                 | Cayman Chemical   | 13031     | 10 $\mu$ M       |

**Supplementary Table 23. Stage 2 Platedown Media**

| Stage 2 Platedown<br>(Day 6) | Manufacturer          | Catalog # | 1X Concentration |
|------------------------------|-----------------------|-----------|------------------|
| IMDM                         | Life Technologies     | 12440061  | 47.45%           |
| F12                          | Life Technologies     | 11765062  | 47.45%           |
| NEAA                         | Life Technologies     | 11140-50  | 1%               |
| B27                          | Life Technologies     | 17504044  | 2%               |
| N2                           | Life Technologies     | 17502048  | 1%               |
| Anti/Anti                    | Life Technologies     | 15240062  | 1%               |
| All-trans RA                 | Stemgent              | 04-0021   | 0.1 $\mu$ M      |
| SAG                          | Cayman Chemical       | 11914     | 1 $\mu$ M        |
| LDN193189                    | Cayman Chemical       | 19396     | 0.2 $\mu$ M      |
| CHIR99021                    | Xcess bioscience      | M60002    | 3 $\mu$ M        |
| SB431542                     | Cayman Chemical       | 13031     | 10 $\mu$ M       |
| Rock Inhibitor (Y-27632)     | Stemcell Technologies | 72308     | 10 $\mu$ M       |



**Supplementary Table 24. Stage 2 Media**

| Stage 2<br>(Day 7-11) | Manufacturer      | Catalog # | 1X Concentration |
|-----------------------|-------------------|-----------|------------------|
| IMDM                  | Life Technologies | 12440061  | 47.5%            |
| F12                   | Life Technologies | 11765062  | 47.5%            |
| NEAA                  | Life Technologies | 11140-50  | 1%               |
| B27                   | Life Technologies | 17504044  | 2%               |
| N2                    | Life Technologies | 17502048  | 1%               |
| Anti/Anti             | Life Technologies | 15240062  | 1%               |
| All-trans RA          | Stemgent          | 04-0021   | 0.1 $\mu$ M      |
| SAG                   | Cayman Chemical   | 11914     | 1 $\mu$ M        |
| LDN193189             | Cayman Chemical   | 19396     | 0.2 $\mu$ M      |
| CHIR99021             | Xcess bioscience  | M60002    | 3 $\mu$ M        |
| SB431542              | Cayman Chemical   | 13031     | 10 $\mu$ M       |

**Supplementary Table 25. Stage 3 Media**

| Stage 3<br>(Day 12-Day32) | Manufacturer      | Catalog # | 1X Concentration |
|---------------------------|-------------------|-----------|------------------|
| IMDM                      | Life Technologies | 12440061  | 47.5%            |
| F12                       | Life Technologies | 11765062  | 47.5%            |
| NEAA                      | Life Technologies | 11140-50  | 1%               |
| B27                       | Life Technologies | 17504044  | 2%               |
| N2                        | Life Technologies | 17502048  | 1%               |
| Anti/Anti                 | Life Technologies | 15240062  | 1%               |
| *SAG                      | Cayman Chemical   | 11914     | 0.1 $\mu$ M      |
| db-cAMP                   | Millipore         | 28745     | 0.1 $\mu$ M      |
| All-trans RA              | Stemgent          | 04-0021   | 0.5 $\mu$ M      |
| Compound E                | Calbiochem        | 565790    | 0.1 $\mu$ M      |
| DAPT                      | Cayman Chemical   | 13197     | 2.5 $\mu$ M      |
| Ascorbic Acid             | Sigma-Aldrich     | A4403     | 200 ng/mL        |
| BDNF (-80)                | Peprtech          | 450-02    | 10 ng/mL         |
| GDNF (-80)                | Peprtech          | 450-10    | 10 ng/mL         |

**Supplementary Table 26. Antibody reagents for iPS Evaluation**

| Antibody or Stain               | Manufacturer      | Catalog # | Dilution |
|---------------------------------|-------------------|-----------|----------|
| SMI 32                          | Biolegend         | 801701    | 1:1000   |
| Human Islet-1 Antibody          | R&D               | AF1837    | 1:250    |
| Nkx-6.1                         | DSHB              | F55A10-s  | 1:1000   |
| Tuj (TUBB3 polyclonal antibody) | Abnova            | PAB7874   | 1:1000   |
| Anti-Nestin, Human Antibody     | Sigma Aldrich     | ABD69     | 1:1000   |
| S100beta                        | Sigma Aldrich     | S2532     | 1:250    |
| Donkey anti-mouse secondary     | Life Technologies | A-10037   | 1:1000   |
| Donkey anti-rabbit secondary    | Life Technologies | A-31573   | 1:1000   |
| Donkey anti-goat secondary      | Life Technologies | A-21447   | 1:1000   |
| DAPI                            | Life Technologies | D3571     | 0.1µg/mL |
